# Supplementary material for: The power of Para sport: the effect of performance-focused swimming training on motor function in adolescents with cerebral palsy and high support needs (GMFCS IV) – a single-case experimental design with 30-month follow-up
Source: HighWire-hosted journal article supplement (doi:10.1136/bjsports-2023-107689), 2024-05-10
Supplement: bjsports-2023-107689supp001_data_supplement.pdf [file bjsports-2023-107689supp001_data_supplement.pdf]

CENT flow diagram

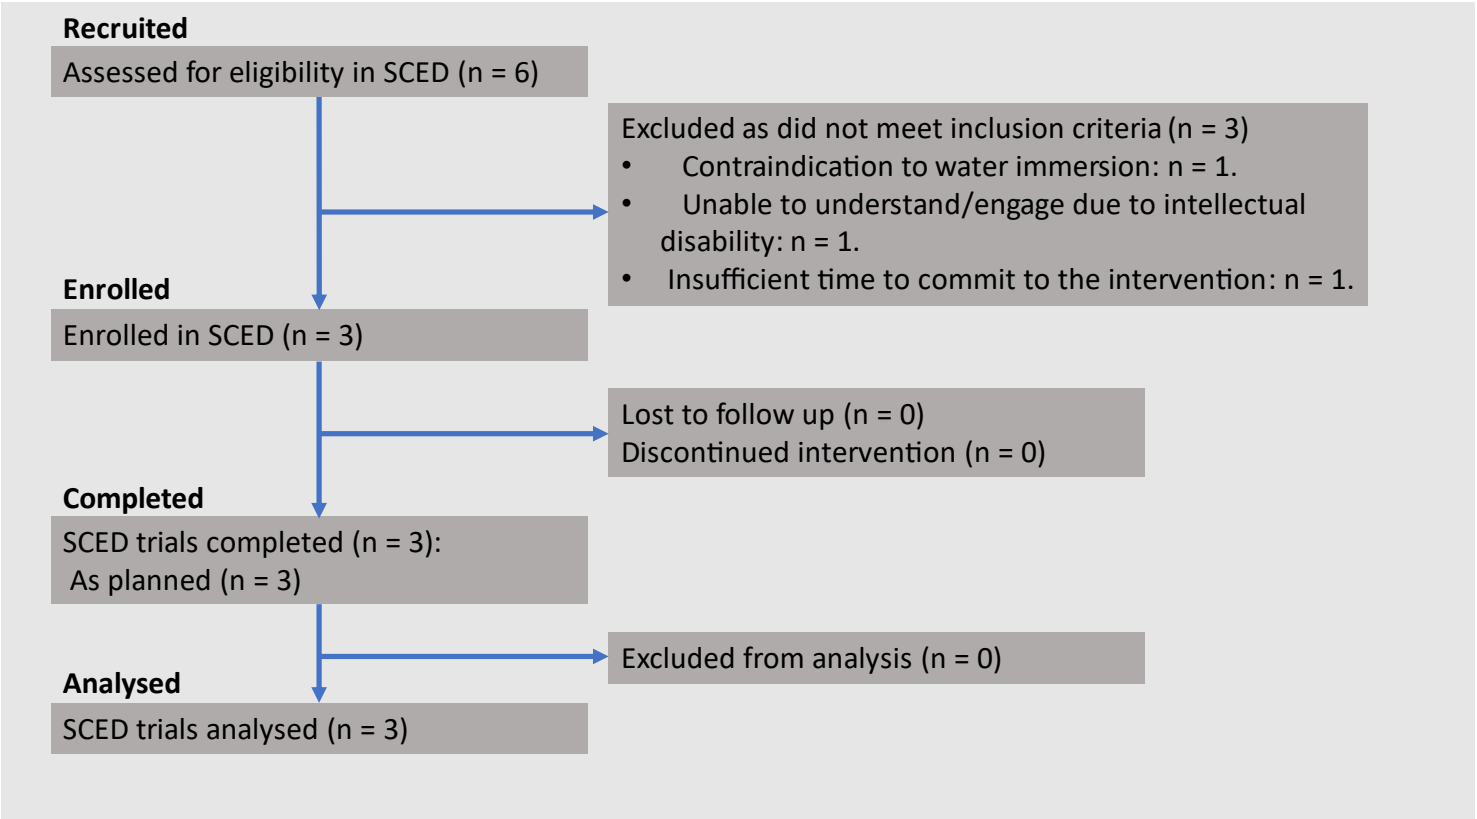

Appendix 1: CENT flow diagram for MB-SCED study, adapted from CONSORT flow diagram, as per CENT guidelines[1]

1. Vohra, S., et al., *CONSORT extension for reporting N-of-1 trials (CENT) 2015 Statement*. BMJ, 2015. **350**(may14 17): p. h1738-h1738.
